# Supplementary material
Source: PubMed Central journal article supplement (PMC11443607)
Supplement: joces-134-257535-s1.pdf [file joces-134-257535-s1.pdf]

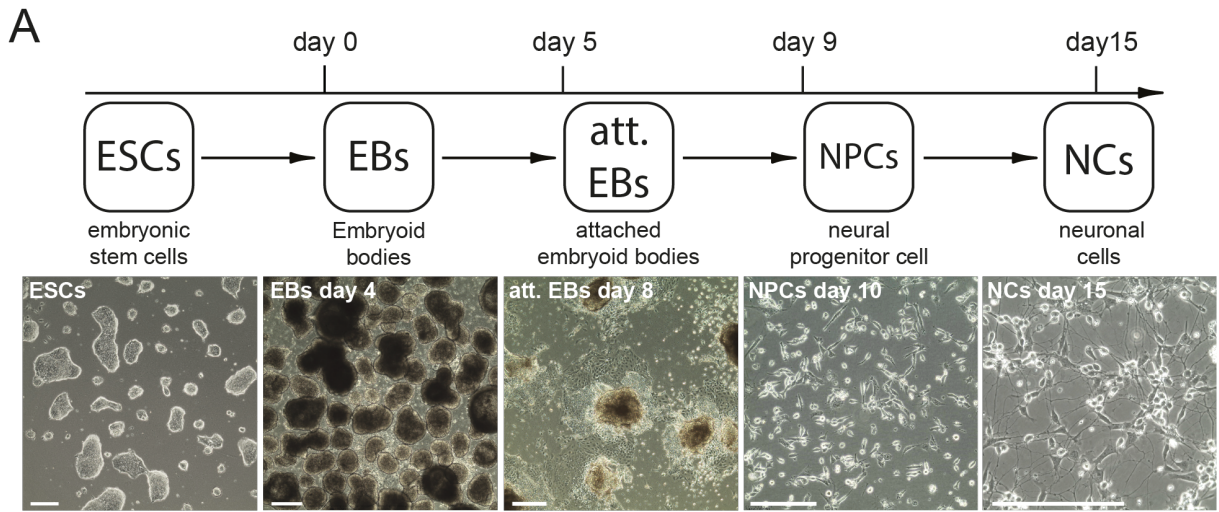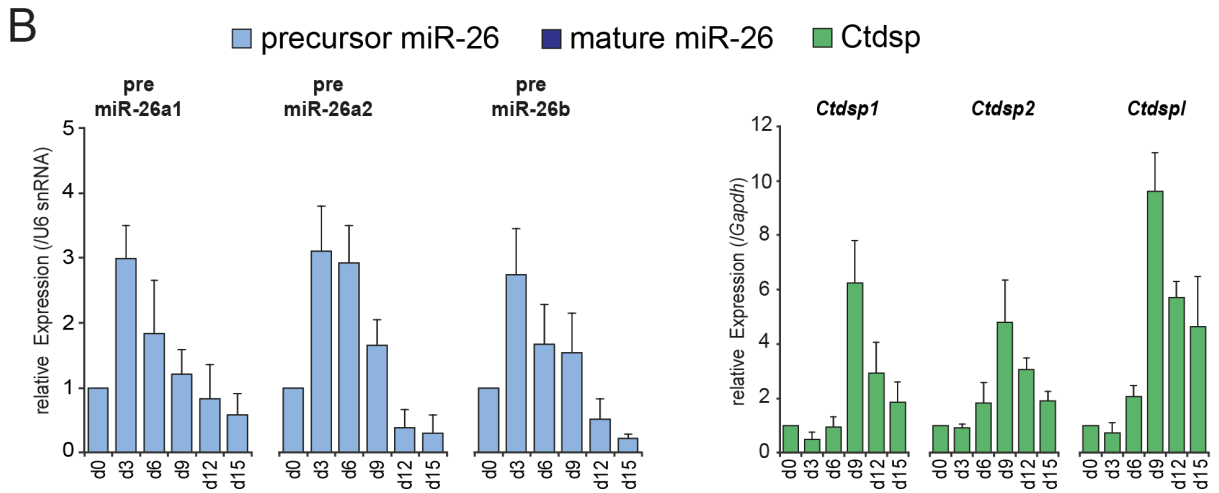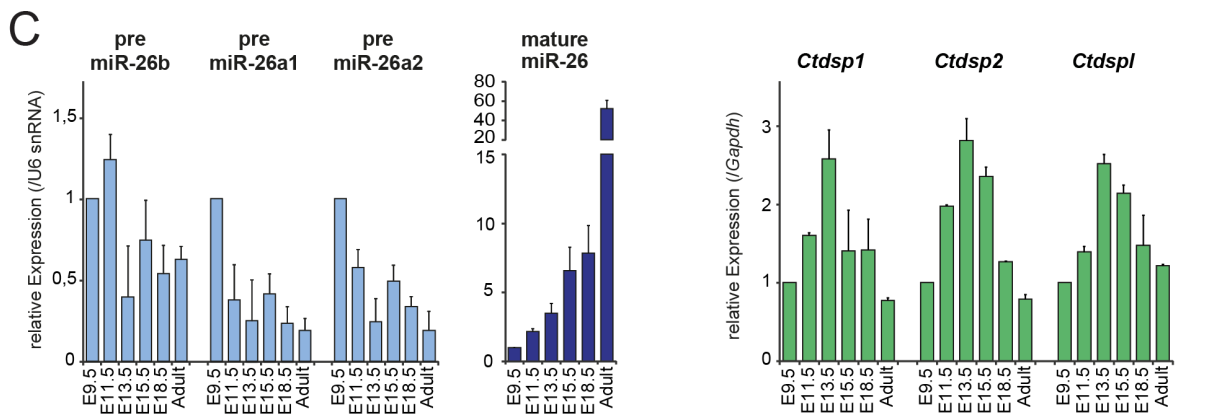

**Figure S1. Expression of miR-26 family members and Ctdsp host genes in differentiating ESCs and during mouse development.**

(A) Schematic representation of the differentiation protocol. Scale bars: 250µm (B) Expression pattern of pre-miR-26a1, -26a2, -26b and *Ctdsp1*, *Ctdsp2* and *CtdspL* during WT ESC differentiation. n=4 biological replicates, mean ± SD. (C) qRT-PCR analyses of precursor and mature miR-26 and *Ctdsp1/2/L* in the brain of mice during embryonal development and in adult brains, n = 4 biological replicates, mean ± SD.

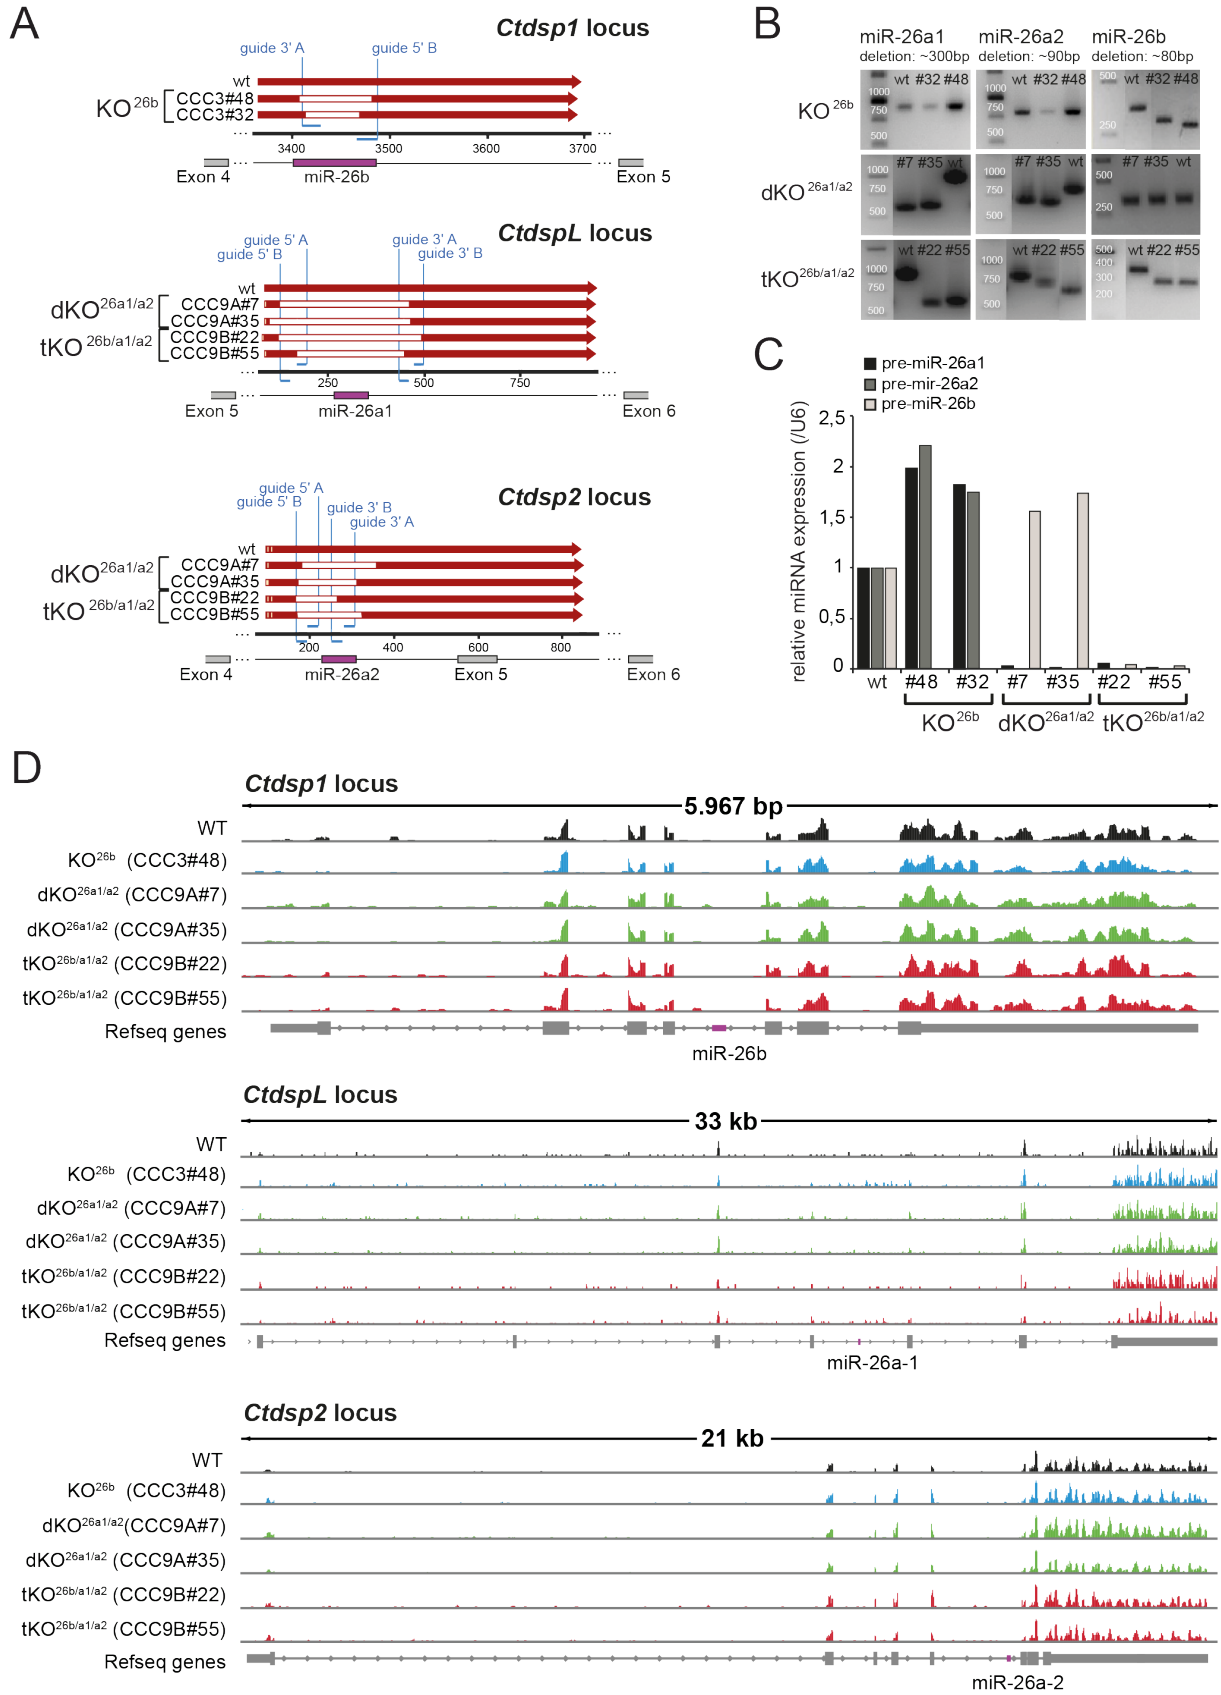

**Figure S2. Generation and validation of miR-26 KO ES cell lines.** (A) Shown are the *Ctdsp* loci, the location of miR-26 family members and the guide RNAs for Cas9-nickase deletion. WT sequences are represented by a red solid arrow, deletions by open areas. Individual ESC clone names are indicated. (B) miR-26b-, miR-26a1- and miR-26a2-specific PCR analysis on genomic DNAs of WT and of miR-26 KO ESC clones. Predicted sizes of the deletions are indicated. (C) qRT-PCR analysis specific for pre-miR-26a1, pre-miR-26a2 and pre-miR-26b using RNA samples of WT and of KO ESCs clones. (D) Screen shots of *Ctdsp1*, *CtdspL* and *Ctdsp2* loci and detected reads using RNA-Seq data of WT and miR-26 KO ESC clones.

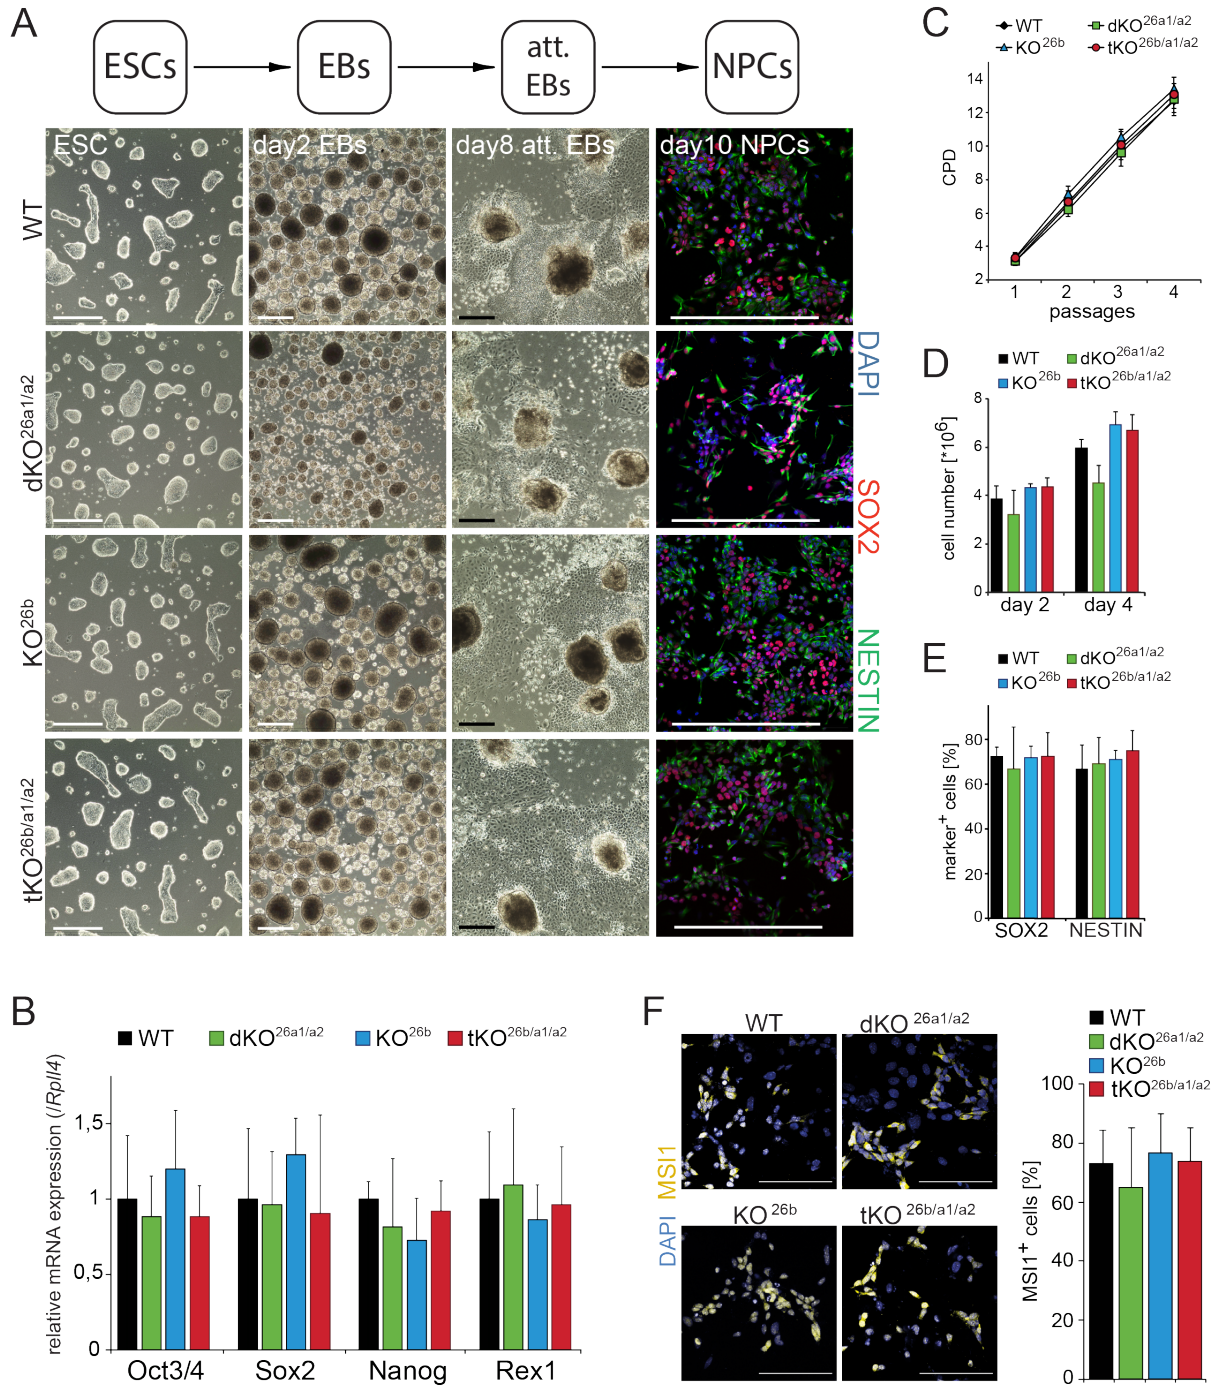

**Figure S3. KO of miR-26 family members leaves differentiation of ESCs to neural progenitor cells (NPCs) unaffected.** (A) Scheme of individual stages of *in vitro* differentiation from ESCs to NPCs (top). Phase contrast panels show representative morphological changes of WT and miR-26 KO cultures during neural differentiation from undifferentiated ESCs via embryoid bodies (EBs) to attached EBs (att. EBs). Also shown are SOX2- and NESTIN-specific immunostainings of WT, KO<sup>26b</sup>, dKO<sup>26a1/a2</sup> and tKO<sup>26b/a1/a2</sup> NPC cultures (day 10, right column). Scale bars: 250µm. (B) qRT-PCR analysis specific for *Oct3/4*, *Sox2*, *Nanog* and *Rex1* in WT and miR-26 KO ESCs, n=3 biological replicates, mean ± SD. (C) Quantification of cumulative population doublings (CPD) of WT and miR-26 KO cultures ESCs throughout 4 passages (ESCs re-plated every 2nd day), n = 3 biological replicates, mean ± SD. (D) Single cell suspensions of WT and miR-26 KO EBs on day 2 and 4 were prepared and average cell numbers were determined ( $1 \times 10^6$  ESCs plated at day 0), n = 3 biological replicates, mean ± SD. (E) Quantification of immunostainings shown in panel A (right column). Frequencies of SOX2<sup>+</sup> and NESTIN<sup>+</sup> cells are indicated, n = 3 biological replicates, mean ± SD. (F) MSI1-specific immunostainings of WT and miR-26 KO NPC cultures (day 10) and their quantification (right), n = 3 biological replicates, mean ± SD. Scale bars: 100 µm.

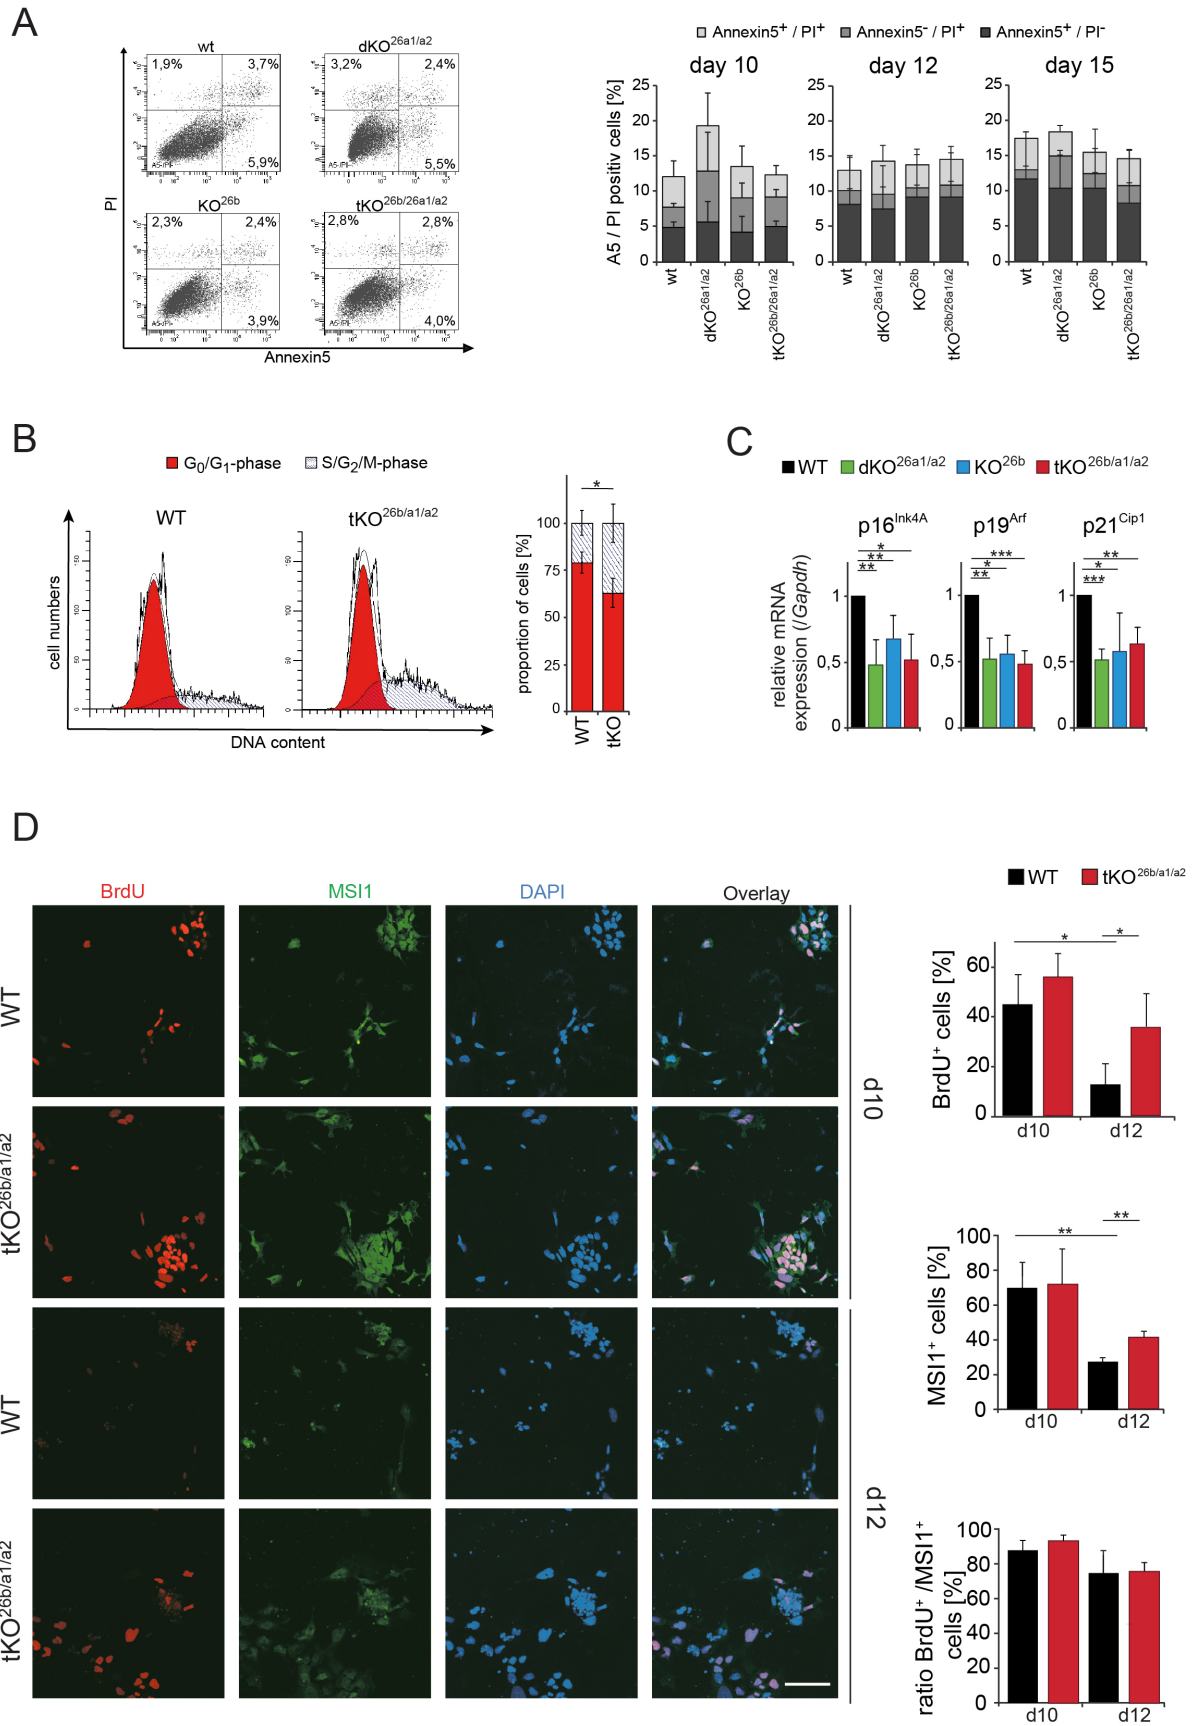

### Figure S4. Apoptosis and cell cycle regulation in NPC cultures

**A)** Flow cytometric apoptosis and cell death analysis in WT and miR-26 KO NC cultures. Representative FACS plot (Annexin5 vs. PI) at day 15 of differentiation (left) and quantification of Annexin5- and Propidiumiodide-positive cells at day 10, 12 and 15 of differentiation (right),  $n = 3$  biological replicates, mean  $\pm$  SD. **(B)** Cell cycle phase analyses of WT and tKO<sup>26b/a1/a2</sup> NC cultures (day 15). The frequencies of G<sub>0</sub>/G<sub>1</sub>, S/G<sub>2</sub>/M-type cells are shown in the bar chart (right).  $n=3$  biological replicates, \*  $p < 0,05$  (t-test). **(C)** qRT-PCR analysis of the cell cycle regulators p16<sup>INK4A</sup>, p19<sup>Arf</sup> and p21<sup>Cip1</sup> in cell cultures at day 15 of differentiation.  $n = 3$  biological replicates, mean  $\pm$  SD, \*  $p < 0,05$ , \*\*  $p < 0,01$ , \*\*\*  $p < 0,001$  (ANOVA). **(D)** Representative immunostaining of BrdU incorporation and costaining with MSI1 of cell cultures at d10 and d12 of neural differentiation. Frequencies of marker+ cell are shown on the right,  $n=3$  biological replicates, mean  $\pm$  SD. Scale bars. 100  $\mu$ m, \*  $p < 0,05$ , \*\*  $p < 0,01$  (ANOVA).



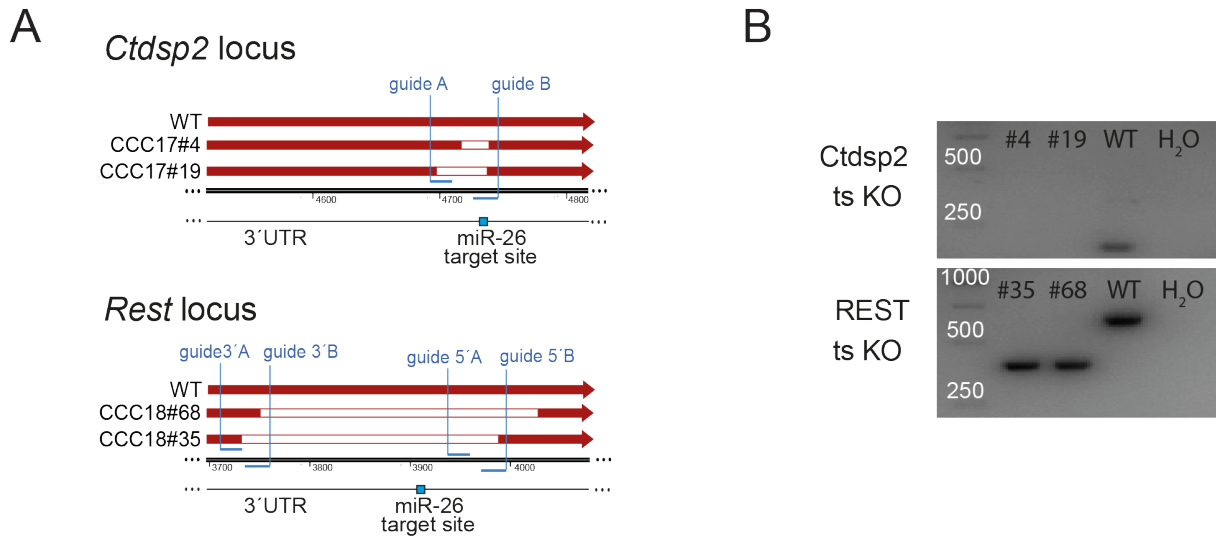

**Figure S5. Generation and validation of *Ctdsp2* and *Rest* 3' UTR miR-26 ts KO ES cell lines.** (A) Schematic representation of the genomic *Ctdsp2* and the *Rest* loci, the location of miR-26 target sites and the guide RNAs for Cas9-nickase deletion are indicated. WT sequences are represented by a red solid arrow, deletions by open areas. Individual ESC clone names are indicated on the left. (B) miR-26 target site-specific PCR analysis on genomic DNAs of WT and of miR-26 target site KO ESC clones.

A

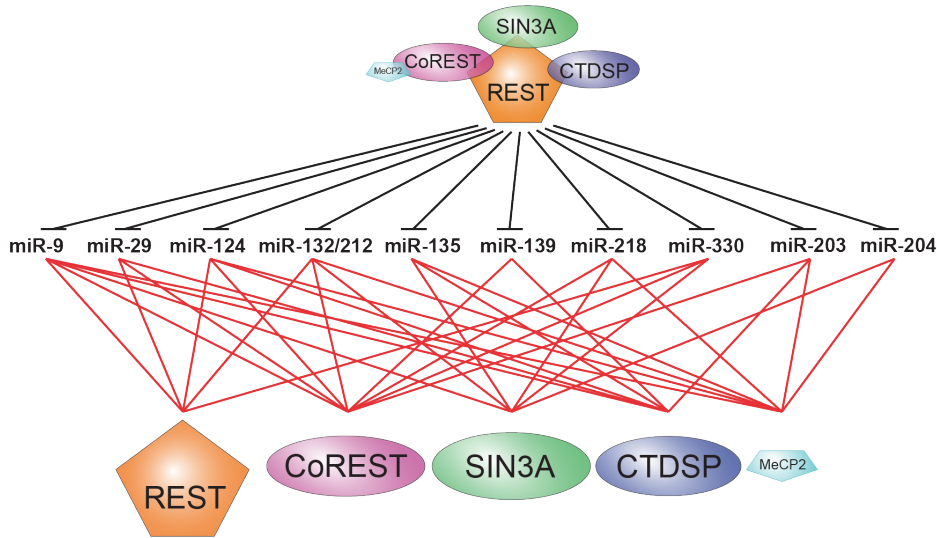

B

protein coding genes with RE1 site

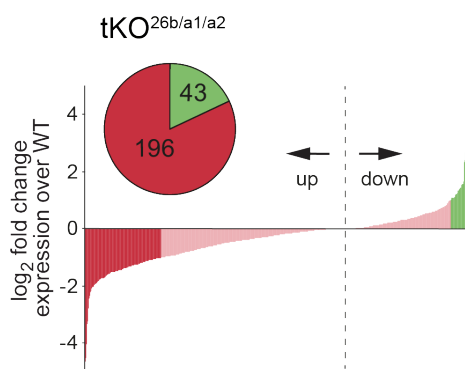

C

GO-terms (biological processes) of downregulated RE1 genes

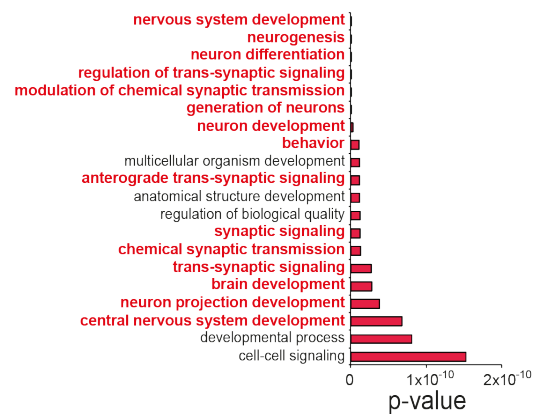

**Figure S6. REST/miR network and the global downregulation of RE1 protein-coding genes in miR-26 KO cells**

(A) Scheme of REST to miR / miR to REST regulation. REST regulated miRNAs and their predicted targeting to REST complex members are shown ([http://www.targetscan.org/mmu\\_71/](http://www.targetscan.org/mmu_71/)).

(B) Global down- (red) and upregulated (green) protein-coding genes with a RE1 sequence 10 kb upstream and 10 kb downstream of transcriptional start site in tKO<sup>26b/a1/a2</sup> cells compared to WT cells at day 15 of differentiation. Pie chart shows numbers of down- and up-regulated transcripts. (C) GO Term analyses of downregulated genes shown in A. No GO terms were retrieved for upregulated genes.

**Table S1:** Genomic target sequences and CRISPR oligonucleotides (Cas9 D10A nickase)

| Name                                                                         | Sequence (5' – 3'), PAM sequences underlined                                                          |
|------------------------------------------------------------------------------|-------------------------------------------------------------------------------------------------------|
| <b>miR-26b 5'A target</b><br><i>miR26b 5'A F</i><br><i>miR26b 5'A R</i>      | <b>GAATTACTTGA<u>ACTGGGTCCCGG</u></b><br>CACCGAATTACTTGA <u>ACTGGGTCC</u><br>AAACGGACCCAGTTCAAGTAATTC |
| <b>miR-26b 3'B target</b><br><i>miR26b 3'B F</i><br><i>miR26b 3'B R</i>      | <b>TTCTCCATTACTTGGCTCGGGGG</b><br>CACCGTTCTCCATTACTTGGCTCGG<br>AAACCCGAGCCAAGTAATGGAGAAC              |
| <b>miR-26a1 5'A target</b><br><i>miR26a1 5'A F</i><br><i>miR26a1 5'A R</i>   | <b>CTGCACTCCGGACGTGCTTGTGG</b><br>CACCGCTGCACTCCGGACGTGCTTG<br>AAACCAAGCACGTCCGGAGTGCAGC              |
| <b>miR-26a1 5'B target</b><br><i>miR26a1 5'B F</i><br><i>miR26a1 5'B R</i>   | <b>TCTTTGGCAGTAGACACCCCGGG</b><br>CACCGTCTTTGGCAGTAGACACCCC<br>AAACGGGGTGTCTACTGCCAAAGAC              |
| <b>miR-26a1 3'A target</b><br><i>miR26a1 3'A F</i><br><i>miR26a1 3'A R</i>   | <b>CAAGCTTGGCTACAGGCAAAGGG</b><br>CACCGCAAGCTTGGCTACAGGCAAA<br>AAACTTTGCCTGTAGCCAAGCTTGC              |
| <b>miR-26a1 3'B target</b><br><i>miR26a1 3'B F</i><br><i>miR26a1 3'B R</i>   | <b>TCCCGGAGACTCAGGACCGGAGG</b><br>CACCGTCCCGGAGACTCAGGACCGG<br>AAACCCGGTCTGAGTCTCCGGGAC               |
| <b>miR-26a2 5'A target</b><br><i>miR-26a2 5'A F</i><br><i>miR-26a2 5'A R</i> | <b>CGGCTTGTGTAGGTCCCATCTGG</b><br>CACCGCGGCTTGTGTAGGTCCCATC<br>AAACGATGGGACCTACACAAGCCGC              |
| <b>miR-26a2 5'B target</b><br><i>miR-26a2 5'B F</i><br><i>miR-26a2 5'B R</i> | <b>CTGCTGGAATCCCGTACAGAAGG</b><br>CACCGCTGCTGGAATCCCGTACAGA<br>AAACTCTGTACGGGATTCCAGCAGC              |
| <b>miR-26a2 3'A target</b><br><i>miR-26a2 3'A F</i><br><i>miR-26a2 3'A R</i> | <b>TGGACGGACACAGCCTATCCTGG</b><br>CACCGTGGACGGACACAGCCTATCC<br>AAACGGATAGGCTGTGTCCGTCCAC              |
| <b>miR-26a2 3'B target</b><br><i>miR-26a2 3'B F</i><br><i>miR-26a2 5'B R</i> | <b>TCTTGATTACTTGTCTTCTGGAGG</b><br>CACCGTCTTGATTACTTGTCTTCTGG<br>AAACCCAGAAACAAGTAATCAAGAC            |
| <b>Ctdsp2 A ts target</b><br><i>Ctdsp2 A ts F</i><br><i>Ctdsp2 A ts R</i>    | <b>TATCAAATCATGAAGCAAGGTGG</b><br>CACCGTATCAAATCATGAAGCAAGG<br>AAACCCTTGCTTCATGATTTGATAC              |

|                           |                                        |
|---------------------------|----------------------------------------|
| <b>Ctdsp2 3'B target</b>  | <b>TATTCAAAACTTGA<u>ACTGTAGG</u></b>   |
| <i>Ctdsp2 B ts F</i>      | CACCGTATTCAAAAACTTGA <u>ACTGT</u>      |
| <i>Ctdsp2 B ts R</i>      | AAACACAGTTCAAGTTTTTGAATAC              |
| <b>Rest ts 3'A target</b> | <b>TCCTCTTACATTA<u>ACTCCCGAGG</u></b>  |
| <i>Rest ts 3'A F</i>      | CACCGTCCTCTTACATTA <u>ACTCCCG</u>      |
| <i>Rest ts 3'A R</i>      | AAACCGGGAGTTAATGTAAGAGGAC              |
| <b>Rest ts 3'B target</b> | <b>AGCTCGTGCAGGCAGGTG<u>CAAGG</u></b>  |
| <i>Rest ts 3'B F</i>      | CACCGAGCTCGTGCAGGCAGGTGCA              |
| <i>Rest ts 3'B R</i>      | AAACTGCACCTGCCTGCACGAGCTC              |
| <b>Rest ts 5'A target</b> | <b>TAACTTAATTTATATA<u>AAGCAGG</u></b>  |
| <i>Rest ts 5'A F</i>      | CACCGGTA <u>ACTTAATTTATATAAAGC</u>     |
| <i>Rest ts 5'A R</i>      | AAACGCTTTATATAAATTAAGTTAC              |
| <b>Rest ts 5'B target</b> | <b>GAAAAAAAAAGAGATTTTA<u>ATTGG</u></b> |
| <i>Rest ts 5'A F</i>      | CACCGGAAAAAAAAAGAGATTTTAAT             |
| <i>Rest ts 5'A R</i>      | AAACATTA <u>AAATCTCTTTTTTTTC</u>       |

**Table S2:** PCR oligonucleotides

**A** cDNA primer (qRT-PCRs)

| Name                         | Sequence (5' - 3')      |
|------------------------------|-------------------------|
| <i>Gapdh F</i>               | TGGAGAAACCTGCCAAGTATG   |
| <i>Gapdh R</i>               | TCATACCAGGAAATGAGCTTGA  |
| <i>Rpl4 F</i>                | TTGGGTTGTATTCACTCTGCG   |
| <i>Rpl4 R</i>                | CAGACCAGTGCTGAGTCTTGG   |
| <i>Oct4 F</i>                | CCGTGAAGTTGGAGAAGGTG    |
| <i>Oct4 R</i>                | GAAGCGACAGATGGTGGTCT    |
| <i>Sox2 F</i>                | GCGGAGTGGAAACTTTTGTCC   |
| <i>Sox2 R</i>                | CGGGAAGCGTGTACTTATCCTT  |
| <i>Nanog F</i>               | TCTTCCTGGTCCCCACAG TTT  |
| <i>Nanog R</i>               | GCAAGAATAGTTCTCGGGATGAA |
| <i>Ctdsp1 F</i>              | CCCAGTCCAGTACCTGCTTC    |
| <i>Ctdsp1 R</i>              | CATCTATCTCCACCGGGATG    |
| <i>Ctdsp2 F</i>              | GGAAGGGACCTGAGGAAAAC    |
| <i>Ctdsp2 R</i>              | CCTCGAAGACTGGAATCAGG    |
| <i>CtdspL F</i>              | GTTGAAATCGACGGAACCAT    |
| <i>CtdspL R</i>              | GCCAAGCTGGCAGTAAAGAG    |
| <i>Neurod1 F</i>             | ATGACCAAATCATACAGCGAGAG |
| <i>Neurod1 R</i>             | CCAGCGACACTGAGTCCTG     |
| <i>Neurog1 F</i>             | CCAGCGACACTGAGTCCTG     |
| <i>Neurog1 R</i>             | CGGGCCATAGGTGAAGTCTT    |
| <i>Msi1 F</i>                | TAAAGTGCTGGCGCAATCG     |
| <i>Msi1 R</i>                | TCTTCGTCCGAGTGACCATCT   |
| <i>Pax6 F</i>                | TACCAGTGTCTACCAGCCAAT   |
| <i>Pax6 R</i>                | TGCACGAGTATGAGGAGGTCT   |
| <i>Ncam1 F</i>               | ACCACCGTCACCACTAACTCT   |
| <i>Ncam1 R</i>               | TGGGGCAATACTGGAGGTCA    |
| <i>Tubb3 F</i>               | TTCTGGTGGACTTGGAACCT    |
| <i>Tubb3 R</i>               | CGCACGACATCTAGGACTGA    |
| <i>Rest F</i>                | CATGGCCTTAACCAACGACAT   |
| <i>Rest R</i>                | CGACCAGGTAATCGCAGCAG    |
| <i>p16<sup>Ink4A</sup> F</i> | GTACCCCGATTGAGGTGATG    |
| <i>p16<sup>Ink4A</sup> R</i> | GGAGAAGGTAGTGGGGTCCT    |

|                            |                       |
|----------------------------|-----------------------|
| <i>p19<sup>ARF</sup> F</i> | GCTCTGGCTTTCGTGAACAT  |
| <i>p19<sup>ARF</sup> R</i> | CGAATCTGCACCGTAGTTGA  |
| <i>p21<sup>Cip</sup> F</i> | ACATCTCAGGGCCGAAAAC   |
| <i>p21<sup>Cip</sup> R</i> | GGCACTTCAGGGTTTTCTCTT |

### B miRNA primer (qRT-PCRs)

| Name                      | Cat. No.:  |
|---------------------------|------------|
| <i>snRNA U6</i>           | MS00033740 |
| <i>mmu-miR-26a-5p</i>     | MS00032613 |
| <i>mmu-miR-26b</i>        | MS00001344 |
| <i>mmu-miR-9-5p</i>       | MS00012873 |
| <i>mmu-miR-124-3p</i>     | MS00029211 |
| <i>mmu-miR-218-3p</i>     | MS00006118 |
| <i>mmu-miR-135a-5p</i>    | MS00011130 |
| <i>mmu-miR-26a-2_1_PR</i> | MP00005250 |
| <i>mmu-miR-26a-1_1_PR</i> | MP00005243 |
| <i>mmu-miR-26b_1_PR</i>   | MP00005257 |

### C genomic DNA primer (Endpoint PCRs)

| Name              | Sequence (5' - 3')      |
|-------------------|-------------------------|
| miR-26b del F     | GTCCTTGTGCAGCCCTCTTTC   |
| miR-26b del R     | GCTTAGGGGTGATCCACAAA    |
| miR-26a1 del F    | GCGCTGGTTGTTGTGTCTAA    |
| miR-26a1 del R    | CAGTGAGAGAAGCCCTGGAG    |
| miR-26a2 del F    | CATAGACTGGGTGGCGAGTT    |
| miR-26a2 del R    | GTTTTCTCAGGTCCCTTCC     |
| miR-26ts-CTDSP2 F | AACTGCCCTGCACCATAAGC    |
| miR-26ts-CTDSP2 R | TGGCATCCTACAGTTCAAGTTTT |

|                 |                         |
|-----------------|-------------------------|
| miR-26ts-REST F | CCTCGGCAGAAGCACCG       |
| miR-26ts-REST R | CTGTTTCAGGGGAAGGGAGATTA |

**D** Primer for cloning luciferase reporter constructs  
(lower case letters show mutation sites)

| Name               | Sequence (5' - 3')                                                     |
|--------------------|------------------------------------------------------------------------|
| Rest 3'UTR F       | GATCCTCGAGCTGAGCCTCGGCAGAAGC                                           |
| Rest 3'UTR R       | GATCGCGGCCGCATGTTTAACTTATCCTACACAATCTTGACC                             |
| Ctdsp2 3'UTR F     | GATCCTCGAGCCCATGGGTCCCTAATTAAGAAGTTG                                   |
| Ctdsp2 3'UTR R     | GATCCTCGAGTGGTTGTCCCAAGTGTTGCTGATCGCGGCCG<br>CCAGACTCTTAATGGCATCCTACAG |
| Rest mut 3'UTR F   | ATTGGCTTAGTAAATatCTtaGAGAATTTGCCTGCTT                                  |
| Rest mut 3'UTR R   | AAAGCAGGCAAATTCTctAAGatATTTACTAAGCCAAT                                 |
| Rest 2.mut 3'UTR F | CTAGTAACTAGTGGTAAcaTTagAATGGTAGCATTCTTTACAGC                           |
| Rest 2.mut 3'UTR R | GCTGTAAAGAATGCTACCATTctAAtgTTACCACTAGTTACTAG                           |
| Ctdsp2 mut 3'UTR F | TTGTTGTATTCAAAAcaTTagACTGTAGGATGCCATT                                  |
| Ctdsp2 mut 3'UTR R | AATGGCATCCTACAGTctAAtgTTTTGAATACAACAA                                  |
